# Supplementary material for: Cytokine Profiling of Amniotic Fluid from Congenital Cytomegalovirus Infection
Source: MDPI journal article supplement (doi:10.3390/v14102145), 2022-09-28

**Table S1.** Summary of neonatal assessment of infected neonates.

| SampleID | Fetal gender | GA amniocentesis | VL amniotic fluid (log) | GA cordocentesis | VL fetal blood | Fetal platelets | Prenatal imaging                              | Pregnancy outcome | BW <3rd percentile | TF-US                                  | AABR       | FE     | Symptomatic asymptomatic newborn |
|----------|--------------|------------------|-------------------------|------------------|----------------|-----------------|-----------------------------------------------|-------------------|--------------------|----------------------------------------|------------|--------|----------------------------------|
| 7        | 1            | 23.57            | 7                       | 24.57            | 3.9            | 139000          | HEB                                           | LB                | no                 | normal                                 | normal     | normal | asymptomatic                     |
| 25       | 1            | 22.29            | 6.2                     | 23.86            | 3              | 196000          | normal                                        | LB                | no                 | normal                                 | normal     | normal | asymptomatic                     |
| 27       | 1            | 20.71            | 6.3                     | 23               | 4.4            | 195000          | normal                                        | LB                | no                 | normal                                 | normal     | normal | asymptomatic                     |
| 35       | 2            | 20.29            | 7.1                     | 22               | 6.3            | 171000          | PIMG, SMG, HEB                                | LB                | no                 | normal                                 | normal     | normal | asymptomatic                     |
| 37       | 1            | 21.57            | 6.1                     | 22.43            | 5              | 132000          | SMG, HMG, HEB                                 | LB                | no                 | normal                                 | normal     | normal | asymptomatic                     |
| 41       | 2            | 20.29            | 7                       | 21               | 6.9            | 131000          | HEB, SEC, PIMG                                | LB                | no                 | unilateral SEC                         | normal     | normal | asymptomatic                     |
| 47       | 1            | 20.71            | 5.3                     | 24.43            | 3.7            | 138000          | normal                                        | LB                | no                 | normal                                 | normal     | normal | asymptomatic                     |
| 51       | 2            | 24               | 6.4                     | 25               | 4.9            | 166000          | normal                                        | LB                | no                 | normal                                 | normal     | normal | asymptomatic                     |
| 97       | 2            | 20.29            | 6.4                     | 22.14            | 5.5            | 192000          | normal                                        | LB                | no                 | normal                                 | normal     | normal | asymptomatic                     |
| 1        | 1            | 27.43            | 5.04                    | 29               | 4.3            | 156000          | HEB, severe IUGR                              | LB                | yes                | normal                                 | normal     | normal | symptomatic                      |
| 9        | 2            | 33.14            | 7.7                     | 34.86            | 2.9            | 286000          | HEB, SMG, LSC, SEC                            | LB                | no                 | bilateral SEC, asymmetry of LV         | normal     | normal | symptomatic                      |
| 11       | 2            | 32.86            | 7.5                     | 35.71            | 3.1            | 199000          | TC, HSWM, IVS, HMG, SMG                       | LB                | no                 | mild VMG, bilateral SEC, bilateral LSC | normal     | normal | symptomatic                      |
| 13       | 1            | 21.86            | 7.2                     | 22.86            | 5.7            | 196000          | normal                                        | LB                | no                 | normal                                 | normal     | normal | symptomatic                      |
| 33       | 1            | 24.86            | 7.7                     | 32.57            | 3              | 254000          | PIMG, HEB, LSC                                | LB                | no                 | bilateral LSC                          | normal     | normal | symptomatic                      |
| 43       | 2            | 20.71            | 7.3                     | 21.71            | 5.8            | 199000          | HEB                                           | LB                | no                 | normal                                 | bilateral  | normal | symptomatic                      |
| 45       | 2            | 27               | 7.3                     | 28               | 5.5            | 110000          | HEB, HSWM                                     | LB                | no                 | normal                                 | bilateral  | normal | symptomatic                      |
| 49       | 1            | 23.14            | 8.1                     | 24.86            | 4.3            | 109000          | HSWM, HEB, SMG                                | LB                | no                 | bilateral SEC, abnormal WM             | bilateral  | normal | symptomatic                      |
| 55       | 1            | 23               | 8.4                     | 25               | 5.7            | 55000           | normal                                        | LB                | no                 | normal                                 | bilateral  | normal | symptomatic                      |
| 57       | 2            | 19.86            | 6.8                     | 20.57            | 4.7            | 231000          | HEB                                           | LB                | no                 | normal                                 | unilateral | normal | symptomatic                      |
| 59       | 2            | 25               | 7.4                     | 25.57            | 7              | 119000          | normal                                        | LB                | no                 | normal                                 | unilateral | normal | symptomatic                      |
| 61       | 1            | 23.57            | 8.07                    | 24.57            | 5.9            | 140000          | HSWM                                          | LB                | no                 | normal                                 | bilateral  | normal | symptomatic                      |
| 63       | 1            | 21.29            | 6                       | 22.29            | 5.2            | 145000          | normal                                        | LB                | no                 | bilateral LSC and SEC                  | bilateral  | normal | symptomatic                      |
| 53       | 2            | 34.57            | 7.4                     | 36.71            | 5.9            | NP              | severe IUGR, severe MIC, HMG, SMG, SEC, LSC   | TOP               | NA                 | NA                                     | NA         | NA     | Symptomatic and severe           |
| 65       | NA           | 32               | 7.9                     | NA               | NA             | NP              | mild bilateral VMG, PMG                       | TOP               | NA                 | NA                                     | NA         | NA     | Symptomatic and severe           |
| 67       | 1            | 22               | 6.95                    | NA               | NA             | NP              | severe IUGR, severe MIC, PIMG, bilat VMG      | ND                | NA                 | NA                                     | NA         | NA     | Symptomatic and severe           |
| 69       | 1            | 25.14            | 6.6                     | 25.14            | 6.1            | 35000           | bilateral VMG, LSC, hydrops, HMG              | IUFD              | NA                 | NA                                     | NA         | NA     | Symptomatic and severe           |
| 71       | 2            | 17.14            | 6.7                     | 21.14            | 3.6            | 11000           | MIC, VMG, HEB, ASC, HMG, IUGR                 | TOP               | NA                 | NA                                     | NA         | NA     | Symptomatic and severe           |
| 73       | 2            | 22               | 6                       | 26.86            | 5              | NP              | PMG, IVS, TC, HSWM, HMG, SMG                  | TOP               | NA                 | NA                                     | NA         | NA     | Symptomatic and severe           |
| 75       | 2            | 24.86            | 6.8                     | 25.14            | 6.2            | 122000          | IVS, TC, PMG                                  | TOP               | NA                 | NA                                     | NA         | NA     | Symptomatic and severe           |
| 77       | 1            | 18               | 5.3                     | 19.71            | 6.2            | 81000           | MIC, VMG, HEB, PIMG, severe IUGR, ASC, PMG    | TOP               | NA                 | NA                                     | NA         | NA     | Symptomatic and severe           |
| 79       | 2            | 24.71            | 7.1                     | 26.71            | 4.4            | 119000          | IUGR, HEB, HMG, HSWM, bilateral SEC and TC    | TOP               | NA                 | NA                                     | NA         | NA     | Symptomatic and severe           |
| 81       | 1            | 17.86            | 6.3                     | NA               | NA             | NP              | HEB, SEC                                      | IUFD              | NA                 | NA                                     | NA         | NA     | Symptomatic and severe           |
| 83       | 2            | 21.29            | 5.8                     | 23               | 4.8            | 100000          | MIC, IEB                                      | TOP               | NA                 | NA                                     | NA         | NA     | Symptomatic and severe           |
| 85       | 1            | 27.57            | 8.6                     | 28.14            | 5.34           | 107000          | HEB, MIC                                      | TOP               | NA                 | NA                                     | NA         | NA     | Symptomatic and severe           |
| 87       | NA           | 18.43            | 5                       | 18.43            | 5              | 13000           | HEB, ASC, hydrops, VMG                        | TOP               | NA                 | NA                                     | NA         | NA     | Symptomatic and severe           |
| 89       | NA           | 20               | NA                      | NA               | NA             | NP              | Severe IUGR, MIC, LSC, cortical abnormalities | TOP               | NA                 | NA                                     | NA         | NA     | Symptomatic and severe           |
| 91       | 2            | 17.14            | 5.8                     | 20.14            | 5              | 81000           | IUGR, HEB, PMB, LSC                           | TOP               | NA                 | NA                                     | NA         | NA     | Symptomatic and severe           |
| 93       | 2            | 22               | 7.2                     | NA               | NA             | NP              | ????                                          | TOP               | NA                 | NA                                     | NA         | NA     | Symptomatic and severe           |
| 95       | 1            | 23.57            | 6.5                     | 25.14            | 4.3            | 129000          | IUGR, VMG, IVS, PMG                           | TOP               | NA                 | NA                                     | NA         | NA     | Symptomatic and severe           |
| 99       | 2            | 27.29            | 7.7                     | 29.71            | 5.5            | NP              | IUGR, SMG, HEB, MIC, VMG, LSC, HSWM           | TOP               | NA                 | NA                                     | NA         | NA     | Symptomatic and severe           |

**Table S2.** Concentrations of all cytokines according to fetal in-fection, symptomatic status at birth, and severity (median and interquartile).

|                | Controls N=40                | Infected fetuses N=40        | Asymptomatic (c) infected fetuses N=9 | Symptomatic infected fetuses N=31 | Symptomatic and non-severe infection N=13 | Symptomatic and severe infection N=8 | P-value infected vs. non-infected | P-value symptomatic vs. asymptomatic | Pre-processing filter |
|----------------|------------------------------|------------------------------|---------------------------------------|-----------------------------------|-------------------------------------------|--------------------------------------|-----------------------------------|--------------------------------------|-----------------------|
| IL1a interne   | 0 (0, 0)                     | 0 (0, 0.0275)                | 0 (0, 0)                              | 0 (0, 0.1)                        | 0 (0, 0)                                  | 0 (0, 0.3275)                        | 0.825                             | 0.5126                               |                       |
| IL1b interne   | 0.295 (0, 0.6)               | 0.35 (0, 1.25)               | 0 (0, 1.2)                            | 0 (0, 1.1)                        | 0.0 (0, 1.1)                              | 0.35 (0, 0.7)                        | 0.2041                            | 0.3107                               |                       |
| IL2 interne    | 0 (0, 0)                     | 0 (0, 0)                     | 0 (0, 0)                              | 0 (0, 0)                          | 0 (0, 0.49)                               | 0 (0, 0)                             | 0.3599                            | 0.5403                               |                       |
| IL4 interne    | 0 (0, 0.925)                 | 0 (0, 1.25)                  | 0 (0, 0)                              | 0 (0, 1.4)                        | 0.6 (0, 4.1)                              | 0 (0, 0)                             | 0.9662                            | 0.9662                               | x                     |
| IL6 interne    | 0 (0, 0)                     | 0 (0, 0.0099)                | 0 (0, 0)                              | 0 (0, 0.02)                       | 0 (0, 0.19)                               | 0 (0, 0.0099)                        | 0.0566                            | <b>0.0110</b>                        |                       |
| IL8 interne    | 0 (0, 0)                     | 0 (0, 0)                     | 0 (0, 0)                              | 0 (0, 0)                          | 0 (0, 0)                                  | 0 (0, 0)                             | 0.4666                            | 0.3193                               |                       |
| IL10 interne   | 0 (0, 0)                     | 0 (0, 0)                     | 0 (0, 0)                              | 0 (0, 0)                          | 0 (0, 0)                                  | 0 (0, 0)                             | 0.3868                            | 0.4117                               |                       |
| IL13 interne   | 0 (0, 0)                     | 0 (0, 0)                     | 0 (0, 0)                              | 0 (0, 0)                          | 0 (0, 0)                                  | 0 (0, 0)                             | 0.3204                            | 0.3748                               |                       |
| IL15 interne   | 32.75 (0, 8.785)             | 4.545 (0.8975, 8.425)        | 4.79 (3.22, 8.4)                      | 4.14 (0.535, 8.405)               | 3 (1.63, 9.94)                            | 3.915 (0, 8.0475)                    | 0.3575                            | 0.2976                               | x                     |
| IL16 interne   | 0 (0, 18.575)                | 0.35 (0, 1.255)              | 0.25 (0, 0.79)                        | 0.44 (0, 1.39)                    | 0.6 (0.2, 1.02)                           | 0.18 (0, 2.59)                       | 0.2943                            | 0.2018                               |                       |
| IL18 interne   | 0 (0, 0.97)                  | 0.35 (0, 1.0525)             | 0 (0, 0)                              | 0.44 (0, 1.175)                   | 0 (0, 0)                                  | 0.155 (0, 16.235)                    | 0.9409                            | 0.0672                               | x                     |
| IL23 interne   | 0 (0, 0)                     | 0 (0, 0)                     | 0 (0, 0)                              | 0 (0, 0)                          | 5.11-9                                    | 3.3 (0, 9.725)                       | 0.3041                            | 0.4902                               |                       |
| GM-CSF interne | 0 (0, 0)                     | 0 (0, 0)                     | 0 (0, 0)                              | 0 (0, 0)                          | 0 (0, 0)                                  | 0 (0, 0.4812)                        | 0.0941                            | 0.0937                               |                       |
| GM-CSF interne | 0 (0, 0)                     | 0 (0, 0)                     | 0 (0, 0)                              | 0 (0, 0)                          | 0 (0, 0)                                  | 0 (0, 0)                             | 0.777                             | 0.774                                |                       |
| GM-CSF interne | 0 (0, 0)                     | 0 (0, 0)                     | 0 (0, 0)                              | 0 (0, 0)                          | 0 (0, 0.1)                                | 0 (0, 0)                             | 0.0059                            | 0.3303                               |                       |
| GM-CSF interne | 0 (0, 0.21)                  | 0 (0, 6.7625)                | 0 (0, 0)                              | 0 (0, 3.165)                      | 0 (0, 0)                                  | 0 (0, 12.6575)                       | 0.3170                            | 0.4657                               | x                     |
| GM-CSF interne | 0 (0, 0)                     | 0 (0, 0)                     | 0 (0, 0)                              | 0 (0, 0)                          | 0 (0, 0)                                  | 0 (0, 0)                             | NA                                | NA                                   |                       |
| IFN-γ interne  | 0 (0, 0)                     | 0 (0, 0)                     | 0 (0, 0)                              | 0 (0, 0)                          | 0 (0, 0)                                  | 0 (0, 0)                             | 0.5103                            | 0.5126                               |                       |
| IFN-γ interne  | 135.945 (54.1875, 272.7225)  | 451.405 (79.335, 956.49)     | 118.04 (49.58, 605.312)               | 505.33 (84.27, 1342.97)           | 717.53 (84.06, 1170.79)                   | 315.52 (84.975, 1419.735)            | <b>0.0037</b>                     | <b>0.0066</b>                        | x                     |
| IFN-γ interne  | 0 (0, 71.1825)               | 0 (0, 60.1925)               | 0 (0, 60.8)                           | 0 (0, 53.1)                       | 0 (0, 59.99)                              | 0 (0, 45.4725)                       | 0.3464                            | 0.3464                               | x                     |
| IFN-γ interne  | 0 (0, 0)                     | 0 (0, 0.6375)                | 0.35 (0, 0.3)                         | 0 (0, 0.63)                       | 0.67 (0, 1.1)                             | 0 (0, 0)                             | 0.3098                            | 0.6702                               |                       |
| IFN-γ interne  | 0 (0, 2.39)                  | 0.375 (0, 5.415)             | 0.37 (0, 2.57)                        | 0.73 (0, 3.52)                    | 0.75 (0, 3.66)                            | 2.13 (0, 3.625)                      | 0.0056                            | <b>0.0156</b>                        | x                     |
| IFN-γ interne  | 0 (0, 9.7825)                | 0.975 (0, 17.695)            | 0 (0, 0)                              | 3.7 (0, 18.655)                   | 10.10 (0, 17.49)                          | 10.05 (0, 18.8275)                   | 0.1480                            | <b>0.0390</b>                        | x                     |
| IFN-γ interne  | 0 (0, 0.0325)                | 0 (0, 0.795)                 | 0 (0, 0)                              | 0 (0, 0.67)                       | 0 (0, 0.28)                               | 0.305 (0, 1.625)                     | 0.3493                            | 0.1648                               | x                     |
| IFN-γ interne  | 0 (0, 0)                     | 0 (0, 0.5025)                | 0 (0, 0.96)                           | 0 (0, 0.44)                       | 0 (0, 0)                                  | 0.1 (0, 0.455)                       | 0.5587                            | 0.2572                               | x                     |
| IFN-γ interne  | 0 (0, 0)                     | 0 (0, 0)                     | 0 (0, 1.9)                            | 0 (0, 0)                          | 0 (0, 2.3)                                | 0 (0, 0)                             | 0.4146                            | 0.9438                               |                       |
| IFN-γ interne  | 0 (0, 1.8625)                | 1.65 (0, 5.65)               | 0 (0, 2.89)                           | 2.08 (0, 5.29)                    | 0 (0, 1.58)                               | 5.505 (1.81, 11.0875)                | 0.0585                            | <b>0.0046</b>                        | x                     |
| IFN-γ interne  | 0 (0, 0)                     | 0 (0, 0)                     | 0 (0, 0)                              | 0 (0, 0)                          | 0 (0, 0)                                  | 0 (0, 0)                             | 0.5127                            | 0.7202                               |                       |
| IFN-γ interne  | 0 (0, 0)                     | 0 (0, 0)                     | 0 (0, 0)                              | 0 (0, 0)                          | 0 (0, 0)                                  | 0 (0, 0)                             | 0.5813                            | 0.7060                               |                       |
| IFN-γ interne  | 0 (0, 58.8599)               | 0 (0, 256.995)               | 149.65 (0, 367.21)                    | 0 (0, 219.925)                    | 200.31 (0, 283.93)                        | 0 (0, 0)                             | 0.3882                            | 0.6579                               | x                     |
| IFN-γ interne  | 0 (0, 0)                     | 0 (0, 0)                     | 0 (0, 0)                              | 0 (0, 0)                          | 0 (0, 0)                                  | 0 (0, 0)                             | 0.8990                            | 0.8990                               |                       |
| IFN-γ interne  | 0 (0, 0)                     | 0 (0, 0)                     | 0 (0, 0)                              | 0 (0, 0)                          | 0 (0, 0)                                  | 0 (0, 0)                             | 0.8545                            | 0.7765                               |                       |
| IFN-γ interne  | 0 (0, 0)                     | 0 (0, 0)                     | 0 (0, 0)                              | 0 (0, 0)                          | 0 (0, 0)                                  | 0 (0, 0)                             | 0.1961                            | 0.2485                               |                       |
| IFN-γ interne  | 70.14 (4.84525, 112.3987)    | 71.997 (43.4525, 123.2492)   | 97.789 (43.2904, 135.68)              | 70.762 (43.1595, 105.6775)        | 95.667 (85.048, 154.972)                  | 55.455 (40.0892, 71.9237)            | 0.3382                            | 0.8890                               | x                     |
| IFN-γ interne  | 0 (0, 0)                     | 0 (0, 0)                     | 0 (0, 0)                              | 0 (0, 0)                          | 0 (0, 0)                                  | 0 (0, 0)                             | 0.6177                            | 0.2707                               |                       |
| IFN-γ interne  | 0 (0, 0)                     | 0 (0, 0)                     | 0 (0, 0)                              | 0 (0, 0)                          | 0 (0, 0)                                  | 0 (0, 0)                             | NA                                | NA                                   |                       |
| IFN-γ interne  | 0 (0, 0)                     | 0 (0, 0)                     | 0 (0, 0)                              | 0 (0, 0)                          | 0 (0, 0)                                  | 0 (0, 0)                             | 0.3204                            | 0.3748                               |                       |
| IL1a surface   | 0 (0, 0)                     | 0 (0, 0)                     | 0 (0, 0)                              | 0 (0, 0.25)                       | 0 (0, 0.61)                               | 0 (0, 0)                             | 0.782                             | 0.2448                               |                       |
| IL1b surface   | 0.6 (0.15, 1.6975)           | 0.7 (0, 1.725)               | 0 (0, 1.48)                           | 0 (0, 1.75)                       | 12 (0, 3.18)                              | 0.3 (0, 1.5)                         | 0.0002                            | 0.3632                               | x                     |
| IL2 surface    | 0 (0, 0.09)                  | 0 (0, 0)                     | 0 (0, 0)                              | 0 (0, 0)                          | 0 (0, 1.7)                                | 0 (0, 0)                             | 0.475                             | 0.8693                               |                       |
| IL4 surface    | 0.65 (0, 2.075)              | 0 (0, 1.2)                   | 0 (0, 2.2)                            | 0 (0, 1.45)                       | 1 (0, 2.2)                                | 0 (0, 0.375)                         | 0.7242                            | 0.3821                               | x                     |
| IL6 surface    | 1.095 (0, 285.5125)          | 1.51 (0, 95.23)              | 1.664 (0.8, 1.8)                      | 1.5 (0.825, 2.3)                  | 1.11 (0.72, 2.64)                         | 1.53 (0.92, 2.252)                   | 0.4305                            | 0.1550                               |                       |
| IL8 surface    | 0.32 (0, 39.75, 17.49)       | 15.375 (8.34, 25.475)        | 15.89 (8.6, 15.57)                    | 14.79 (8.64, 25.495)              | 10 (6.4, 26.5)                            | 14.687 (7.4, 22.855)                 | 0.289                             | 0.2380                               | x                     |
| IL10 surface   | 0 (0, 0.2)                   | 0 (0, 0.725)                 | 0.46 (0, 1)                           | 0 (0, 0.635)                      | 0.57 (0, 0.86)                            | 0 (0, 0.35)                          | 0.7080                            | 0.6580                               | x                     |
| IL13 surface   | 0 (0, 0)                     | 0 (0, 0)                     | 0 (0, 0)                              | 0 (0, 0)                          | 0 (0, 0)                                  | 0 (0, 0)                             | 0.2958                            | 0.6105                               |                       |
| IL15 surface   | 2.875 (0, 6.09)              | 2.38 (0, 5.95)               | 1.85 (0, 7.04)                        | 2.59 (0, 6.2)                     | 1.85 (0, 3.32)                            | 3.925 (0, 9.25)                      | 0.612                             | 0.1895                               | x                     |
| IL16 surface   | 6.5 (0, 44.2)                | 15.245 (0, 44.07)            | 14.5 (2.31, 81.53)                    | 15.99 (0, 37.35)                  | 14 (0.92, 43.86)                          | 17.555 (0, 29.29)                    | 0.7923                            | 0.6597                               |                       |
| IL18 surface   | 0.865 (0, 42.5, 1.54)        | 1 (0.455, 1.3175)            | 1.03 (0.75, 1.2)                      | 1 (0.44, 1.565)                   | 1 (0.47, 1.43)                            | 0.915 (0.4275, 2.1875)               | 0.936                             | 0.9794                               | x                     |
| IL23 surface   | 0 (0, 0)                     | 0 (0, 0)                     | 0 (0, 0)                              | 0 (0, 0)                          | 0 (0, 0)                                  | 0 (0, 0)                             | 0.5053                            | 0.8215                               |                       |
| GM-CSF surface | 2.25 (0, 5.15)               | 2.15 (0, 6.025)              | 1.12 (1, 1.8)                         | 1.6 (0, 4.1)                      | 3.1 (1.5, 7.8)                            | 0 (0, 2.125)                         | 0.112                             | 0.4588                               |                       |
| GM-CSF surface | 0 (0, 0)                     | 0.05 (0, 5.3075)             | 0 (0, 20.61)                          | 0 (0, 5.23)                       | 0 (0, 11.76)                              | 0 (0, 3.22)                          | 0.286                             | 0.474                                | x                     |
| GM-CSF surface | 0 (0, 0)                     | 0 (0, 0)                     | 0 (0, 0)                              | 0 (0, 0)                          | 0 (0, 0)                                  | 0 (0, 0)                             | 0.576                             | 0.7457                               |                       |
| GM-CSF surface | 0 (0, 0)                     | 0 (0, 0.85)                  | 0 (0, 0.8)                            | 0 (0, 0.9)                        | 0 (0, 0)                                  | 0 (0, 0)                             | 0.0694                            | 0.6023                               | x                     |
| GM-CSF surface | 0.345 (0, 27.2825)           | 17.72 (0, 35.245)            | 31.87 (18.85, 41.08)                  | 13.25 (0, 24.95)                  | 15.5 (9.99, 63.78)                        | 10.675 (0, 23.975)                   | 0.1099                            | 0.3307                               | x                     |
| GM-CSF surface | 0 (0, 0)                     | 0 (0, 0)                     | 0 (0, 0)                              | 0 (0, 0)                          | 0 (0, 0)                                  | 0 (0, 0)                             | 0.8278                            | 0.5517                               |                       |
| GM-CSF surface | 0 (0, 0)                     | 0 (0, 0)                     | 0 (0, 0)                              | 0 (0, 0)                          | 0 (0, 1.4)                                | 0 (0, 0)                             | 0.6026                            | 0.7579                               |                       |
| IFN-γ surface  | 216.47 (1.6525, 393.6525)    | 75.625 (30.0, 34.1680, 205)  | 264.38 (18.194, 704.448)              | 832.91 (56.7, 43.2036, 44)        | 740.69 (56.64, 892.91)                    | 1374.01 (62.9, 3813.8825)            | <b>0.0138</b>                     | <b>0.0065</b>                        | x                     |
| IFN-γ surface  | 65.89 (1.6075, 33.3325)      | 24.4 (0, 13.83, 4.3)         | 50.1 (0, 23.063)                      | 58.1 (0, 23.063)                  | 58.1 (0, 23.063)                          | 99.0 (0, 23.063)                     | 0.750                             | 0.750                                | x                     |
| IFN-γ surface  | 0 (0, 0)                     | 0 (0, 0)                     | 0 (0, 0)                              | 0 (0, 0)                          | 0 (0, 1.1)                                | 0.2 (0, 0.5)                         | 0.3105                            | 0.410                                | x                     |
| IFN-γ surface  | 0 (0, 0)                     | 0 (0, 1.13)                  | 0.1 (0, 1.97)                         | 0.2 (0, 0.7)                      | 0.6 (0, 1.3)                              | 0.2 (0, 0.5)                         | 0.106                             | 0.610                                | x                     |
| IFN-γ surface  | 33.65 (0, 13.95)             | 8.725 (3.2, 25.0475)         | 7.84 (3.89, 9.15)                     | 10.34 (3.825, 27.545)             | 5.91 (1.51, 32.8)                         | 16.545 (5.3475, 26.1125)             | 0.826                             | 0.610                                | x                     |
| IFN-γ surface  | 5.75 (0, 13.1075)            | 12.11 (4.075, 28.7625)       | 4.67 (0, 19.7)                        | 12.42 (5, 15.35)                  | 12.42 (5, 15.35)                          | 13.785 (5.6675, 26.1125)             | 0.215                             | 0.098                                | x                     |
| IFN-γ surface  | 0.37 (0, 2.5)                | 0.25 (0, 2.04)               | 0.94 (0, 1.858)                       | 0 (0, 2.735)                      | 0 (0, 3.01)                               | 0.3 (0, 2.395)                       | 0.6574                            | 0.7688                               | x                     |
| IFN-γ surface  | 0.59 (0, 2.3825)             | 0.81 (0, 2.2075)             | 0.94 (0, 2.258)                       | 0.8 (0, 2.615)                    | 2.1 (0, 3.23)                             | 0.63 (0, 1.885)                      | 0.3291                            | 0.4797                               | x                     |
| IFN-γ surface  | 0 (0, 0)                     | 0 (0, 0)                     | 0 (0, 0)                              | 0 (0, 0)                          | 0 (0, 0)                                  | 0 (0, 0)                             | 0.2163                            | 0.3943                               |                       |
| IFN-γ surface  | 3.35 (0, 18.605)             | 15.16 (7.2425, 36.72)        | 15.16 (7.2425, 36.72)                 | 15.16 (7.2425, 36.72)             | 15.16 (7.2425, 36.72)                     | 23.15 (9.9525, 38.92)                | 0.4618                            | 0.571                                | x                     |
| IFN-γ surface  | 0 (0, 0)                     | 0 (0, 0)                     | 0 (0, 0)                              | 0 (0, 0)                          | 0 (0, 0)                                  | 0 (0, 0)                             | 0.006                             | 0.207                                | x                     |
| IFN-γ surface  | 0 (0, 0)                     | 0 (0, 0)                     | 0 (0, 0)                              | 0 (0, 0)                          | 0 (0, 0.2)                                | 0 (0, 0)                             | 0.3007                            | 0.207                                | x                     |
| IFN-γ surface  | 2993.57 (1385.58, 5824.6725) | 3253.165 (2054.665, 6279.77) | 2893.28 (123.97, 3241.92)             | 3319.65 (2196.535, 7297.78)       | 6088.58 (344.9625, 14667.88)              | 6088.58 (344.9625, 14667.88)         | 0.388                             | <b>0.0035</b>                        | x                     |
| IFN-γ surface  | 77.839 (36.0288, 206.202)    | 90.6635 (21.82725, 218.6225) | 25.688 (7.6784, 101.64)               | 125.625 (27.66375, 229.948)       | 89.695 (21.015, 131.802)                  | 220.6135 (62.4187, 410.7662)         | 0.3280                            | <b>0.0302</b>                        | x                     |

|                      |                                 |                                   |                                  |                                 |                                   |                                   |               |               |   |
|----------------------|---------------------------------|-----------------------------------|----------------------------------|---------------------------------|-----------------------------------|-----------------------------------|---------------|---------------|---|
| CCCL6 surface        | 3.0905 (0.24,0825)              | 6.2535 (0.18,9689)                | 7.403 (6.024, 12.118)            | 5.21 (0.19,166)                 | 0.10, 12, 495)                    | 6.507 (0.21,9962)                 | 0.2277        | 0.2115        |   |
| CCCL3 surface        | 5.5545 (0.4972, 16.1912)        | 5.014 (0.4972, 16.1912)           | 4.81 (0.032, 9.604)              | 5.228 (3.4395, 20.9185)         | 4.045 (2.887, 11.555)             | 7.505 (4.2222, 40.366)            | 0.2347        | 0.0964        | x |
| MF1 surface          | 24.0035 (19.1287, 35.0095)      | 32.12985 (16.9355, 49.349)        | 52.644 (0.033, 60.083)           | 24.592 (14.7275, 44.1495)       | 31.37 (20.6, 49.231)              | 19.454 (11.0702, 37.0332)         | 0.2872        | 0.0661        | x |
| IF Na surface        | 0 (0, 0)                        | 0 (0, 0)                          | 0 (0, 0)                         | 0 (0, 0)                        | 0 (0, 0)                          | 0 (0, 0)                          | 0.3466        | 0.9789        | x |
| IF Na surface        | 4.4765 (0.13, 777)              | 5.542 (0.2325, 22.14625)          | 18.033 (4.946, 22.744)           | 4.351 (0.18, 789)               | 15.61 (6.534, 32.629)             | 0.155 (0.0705)                    | 0.4846        | 0.8466        | x |
| IF Nimbda surface    | 0 (0, 0)                        | 0 (0, 0)                          | 0 (0, 0)                         | 0 (0, 0)                        | 0 (0, 0)                          | 0 (0, 0)                          | 0.356         | 0.4606        | x |
| IL13 soluble         | 2.592 (0.8, 8.944)              | 6.67 (1.536, 21.96)               | 3.48 (0.36, 6.516)               | 7.86 (2.332, 34.674)            | 10.92 (2.4, 63.768)               | 5.398 (2.283, 24.12)              | 0.1818        | 0.2031        | x |
| IL2 soluble          | 2.27 (0.57, 10.81)              | 2.106 (0.96, 3.387)               | 1.36 (0.096, 3.84)               | 2.16 (0.96, 3.252)              | 10.92 (1.752, 4.132)              | 1.962 (0.96, 2.526)               | 0.4703        | 0.7137        | x |
| IL2 soluble          | 0 (0, 0.93)                     | 0 (0, 1.644)                      | 0 (0, 1.896)                     | 0 (0, 1.896)                    | 1.392 (0.3, 3.24)                 | 0 (0, 0)                          | 0.5884        | 0.9861        | x |
| IL6 soluble          | 4.13 (0.9, 9.0)                 | 2.76 (0.7, 5.9)                   | 2.4 (0.10, 3.3)                  | 2.76 (0.7, 5)                   | 6.56 (0.8, 9.6)                   | 2.28 (0.4, 5.9)                   | 0.7296        | 0.7296        | x |
| IL6 soluble          | 42.492 (20.535, 75.915)         | 83.424 (41.553, 145.968)          | 119.932 (62.346, 157.092)        | 83.392 (39.506, 138.708)        | 96.561 (54.684, 135.648)          | 58.098 (23.286, 147.744)          | 0.0066        | 0.2769        | x |
| IL8 soluble          | 403.842 (248.019, 828.872)      | 771.18 (387.147, 1121.802)        | 1043.796 (901.004, 1157.904)     | 554.148 (350.796, 1112.064)     | 776.48 (498.48, 1118.628)         | 396.088 (177.504, 897.813)        | 0.489         | 0.9703        | x |
| IL10 soluble         | 0.96 (0, 2.16)                  | 1.26 (0, 2.31)                    | 1.2 (0, 2.4)                     | 1.32 (0, 2.22)                  | 1.8 (1.2, 1.92)                   | 1.26 (0, 2.37)                    | 0.8463        | 0.6952        | x |
| IL13 soluble         | 0 (0, 8.49)                     | 0 (0, 5.445)                      | 0 (0, 7.08)                      | 0 (0, 0)                        | 0 (0, 23.64)                      | 0 (0, 0)                          | 0.4741        | 0.7128        | x |
| IL15 soluble         | 47.766 (30.033, 86.601)         | 52.092 (44.058, 84.81)            | 46.644 (40.44, 53.868)           | 57.594 (45.702, 59.644)         | 49.164 (44.988, 83.04)            | 69.648 (48.702, 97.647)           | 0.3239        | 0.1297        | x |
| IL18 soluble         | 276.66 (128.862, 635.307)       | 264.024 (120.266, 443.604)        | 257.88 (173.256, 546.548)        | 270.168 (168.066, 433.5)        | 358.82 (256.8, 480.552)           | 179.64 (149.307, 412.449)         | 0.7468        | 0.9240        | x |
| IL18 soluble         | 4.705 (1.099, 7.05)             | 7.416 (4.129, 10.698)             | 6.48 (4.48, 9.74)                | 8.124 (4.26, 11.562)            | 5.16 (4.2, 7.2)                   | 10.308 (7.395, 11.85)             | <b>0.0234</b> | <b>0.0060</b> | x |
| IL33 soluble         | 29.196 (0, 248.751)             | 0 (0, 200.427)                    | 0 (0, 32.889)                    | 0 (0, 220.680)                  | 0 (0, 0)                          | 11.412 (0, 25.163)                | 0.4166        | 0.8533        | x |
| Grignatinfuc soluble | 24.9 (12.996, 47.25)            | 12.3 (0.09, 46.14)                | 11.76 (11.28, 25.56)             | 13.68 (8.46, 59.46)             | 35.16 (8.57, 78.56)               | 11.46 (7.89, 53.199)              | 0.1060        | 0.4673        | x |
| Grignatinfuc soluble | 75.24 (37.506, 116.208)         | 54.526 (30.232, 105.816)          | 54.264 (30.523, 247.2956)        | 54.7812 (25.3536, 94.1216)      | 69.4032 (20.218, 106.104)         | 48.1092 (31.1811, 76.0539)        | 0.3783        | 0.5952        | x |
| Excan soluble        | 0 (0, 0)                        | 0 (0, 0)                          | 0 (0, 0)                         | 0 (0, 8.508)                    | 0 (0, 298.32)                     | 0 (0, 0)                          | 0.8109        | 0.5262        | x |
| GMCSF soluble        | 0 (0, 5.754)                    | 3.3 (0, 8.454)                    | 6.132 (2.82, 8.316)              | 259.596 (127.224, 453.066)      | 6.6 (0, 11.664)                   | 164.85 (106.071, 250.467)         | 0.5483        | 0.6260        | x |
| GMCSF soluble        | 239.778 (163.338, 449.448)      | 300.192 (167.295, 681.591)        | 660.06 (368.352, 2956.212)       | 0 (0, 0)                        | 0 (0, 0)                          | 0 (0, 0)                          | 0.8986        | 0.6555        | x |
| HMGB1 soluble        | 0 (0, 0)                        | 0 (0, 0)                          | 0 (0, 0)                         | 0 (0, 0)                        | 0 (0, 0)                          | 0 (0, 0)                          | 0.6023        | 0.7241        | x |
| IFNg soluble         | 0 (0, 0)                        | 0 (0, 9.66)                       | 0 (0, 0)                         | 0 (0, 10.16)                    | 5.04 (0, 9.94)                    | 0 (0, 9.045)                      | 0.0073        | 0.7241        | x |
| IFNg soluble         | 108.92.986 (73.947, 159.795.96) | 24155.274 (13.6712.78, 31171.639) | 13415.462 (7.824.686, 28769.988) | 24195.876 (1.646.94, 50399.329) | 27967.932 (1.8816.576, 35977.848) | 24155.274 (15.066.275, 28695.609) | <b>0.0048</b> | <b>0.0001</b> | x |
| IFNOCCL11 soluble    | 548.298 (384.462, 831.096)      | 838.956 (588.57, 1682.418)        | 822.924 (546.864, 1233.608)      | 1015.44 (609.666, 1809.716)     | 1015.44 (628.452, 1651.2)         | 967.158 (601.602, 1825.788)       | <b>0.0418</b> | 0.0547        | x |
| IFNOCCL11 soluble    | 0 (0, 6.639)                    | 2.88 (0.096, 10.659)              | 3.36 (2.4, 17.28)                | 2.4 (0.918, 7.812)              | 6 (4.92, 12.636)                  | 1.242 (0.669, 3.39)               | 0.2978        | 0.4957        | x |
| MCP soluble          | 657.264 (404.613, 1345.818)     | 1068.272 (770.006, 2085.813)      | 1472.644 (981.768, 2190.672)     | 973.164 (656.324, 1398.594)     | 1135.886 (948.036, 1358.016)      | 739.41 (463.266, 2458.623)        | 0.1303        | 0.3403        | x |
| MCP soluble          | 384.33 (213.141, 518.274)       | 804.144 (567.321, 1407.342)       | 581.1 (480.096, 870.42)          | 833.58 (596.754, 1564.182)      | 794.748 (601.728, 2640.036)       | 972.624 (470.157, 1407.978)       | 0.1183        | 0.0519        | x |
| MIPA soluble         | 16.17 (9.12, 23.94)             | 14.64 (10.437, 22.632)            | 16.44 (11.64, 24.36)             | 14.4 (19.2, 21.828)             | 15.12 (10.8, 24.36)               | 15.12 (10.8, 24.36)               | 0.3749        | 0.5665        | x |
| MIPA soluble         | 26.57 (8.57, 58.05)             | 18.84 (10.33, 45.05)              | 44.64 (13.96, 90.12)             | 16.44 (10.3, 30.846)            | 16.44 (12.36, 36.64)              | 16.02 (8.37, 36.139)              | 0.5332        | 0.8859        | x |
| MIP2 soluble         | 128.32 (97.08, 213.686)         | 159.806 (92.07, 272.025)          | 210.57 (157.764, 283.172)        | 150.62 (80.016, 271.512)        | 164.692 (150.042, 310.464)        | 102.71 (64.846, 172.53)           | 0.3086        | 0.5441        | x |
| MIP3 soluble         | 58.446 (32.901, 91.235)         | 79.614 (59.928, 131.268)          | 86.856 (79.764, 126.432)         | 71.292 (57.246, 135.69)         | 70.812 (61.8, 101.112)            | 75.378 (51.87, 166.944)           | 0.3631        | 0.5440        | x |
| NAF1S soluble        | 0 (0, 14.7)                     | 0 (0, 13.43)                      | 9 (8.16, 21.12)                  | 0 (0, 12.18)                    | 0 (0, 22.56)                      | 0 (0, 6.18)                       | 0.8011        | 0.5399        | x |
| TFE soluble          | 1.44 (0, 3.429)                 | 1.224 (0.84, 2.619)               | 1.56 (1.2, 4.2)                  | 1.2 (0.84, 2.82)                | 1.2 (0.84, 3.6)                   | 1.194 (0.87, 1.587)               | 0.673         | 0.6333        | x |
| TFE soluble          | 725.232 (196.254, 1356.666)     | 757.836 (352.305, 2831.577)       | 6462 (1356.676, 772.752)         | 888.992 (374.388, 2997.594)     | 699.528 (168.756, 898.992)        | 2841.414 (675.408, 7620.282)      | 0.0987        | <b>0.0044</b> | x |
| TRAIL soluble        | 180.4938 (98.5061, 346.6263)    | 299.2086 (141.0222, 802.9308)     | 174.888 (141.1776, 224.6172)     | 415.3464 (155.9106, 888.8652)   | 245.2572 (140.556, 509.3052)      | 589.3542 (119.0777, 1995.1194)    | <b>0.0123</b> | <b>0.0004</b> | x |
| CCCL6 soluble        | 20.2402 (0.63, 27.63)           | 31.014 (0, 54.4239)               | 30.934 (8.0186, 51.4464)         | 31.1284 (0, 56.0728)            | 30.7288 (0, 34.6032)              | 34.4466 (0, 57.7317)              | 0.2920        | 0.4356        | x |
| CCCL3 soluble        | 96.5662 (49.771, 112.0435)      | 92.1534 (47.1810, 162.3532)       | 102.7059 (61.9366, 170.6032)     | 90.1884 (43.3586, 157.977)      | 82.26 (33.36, 149.432)            | 95.428 (64.5236, 167.844)         | 0.7265        | 0.3749        | x |
| MIP1 soluble         | 485.5264 (32.756, 658.4703)     | 503.1714 (406.1358, 785.7092)     | 521.886 (446.208, 600.8464)      | 494.0052 (370.6656, 803.7602)   | 541.5804 (339.2356, 1353.872)     | 472.695 (310.9098, 679.3071)      | 0.0963        | 0.3385        | x |
| IFNa soluble         | 0 (0, 0)                        | 0 (0, 0)                          | 0 (0, 0)                         | 0 (0, 0)                        | 0 (0, 0)                          | 0 (0, 0)                          | 0.555         | 0.5948        | x |
| IFNa soluble         | 25.734 (3.8958, 65.4315)        | 29.4576 (3.6126, 94.3128)         | 31.4477 (12.2596, 64.9956)       | 29.406 (2.6574, 98.6832)        | 46.224 (15.1368, 150.6192)        | 21.396 (2.1384, 36.5508)          | 0.7712        | 0.8165        | x |
| IF Nimbda soluble    | 3.45 (0, 109.911)               | 2.73 (0, 103.23)                  | 31.4477 (12.2596, 64.9956)       | 6.3 (0, 236.491)                | 5.46 (0, 15.21)                   | 106.089 (0, 147.0435)             | 0.3819        | 0.4653        | x |

**Table S3.** Prediction analysis based on principal component analysis. Contribution of each PC for infection and se-verity.

|      | Total variance explained | Infection |         |         | Severity |         |          |
|------|--------------------------|-----------|---------|---------|----------|---------|----------|
|      |                          | Beta      | Se      | p       | Beta     | Se      | p        |
| PC1  | 65.62%                   | 8.8E-05   | 2.3E-05 | 0.00010 | 3.2E-05  | 7.7E-06 | 8.06E-05 |
| PC2  | 22.73%                   | -3.5E-05  | 2.9E-05 | 0.23    | -4.3E-05 | 1.4E-05 | 0.0019   |
| PC3  | 4.98%                    | -5.6E-05  | 6.6E-05 | 0.40    | -2.6E-05 | 3.0E-05 | 0.40     |
| PC4  | 2.12%                    | -3.9E-05  | 8.0E-05 | 0.62    | 1.0E-05  | 4.7E-05 | 0.83     |
| PC5  | 1.43%                    | 3.3E-05   | 9.7E-05 | 0.73    | 9.4E-05  | 5.6E-05 | 0.10     |
| PC6  | 1.09%                    | 6.1E-06   | 1.1E-04 | 0.96    | -4.7E-05 | 6.5E-05 | 0.47     |
| PC7  | 0.52%                    | 6.6E-05   | 1.6E-04 | 0.68    | 1.2E-04  | 9.4E-05 | 0.22     |
| PC8  | 0.43%                    | -6.3E-05  | 1.8E-04 | 0.72    | 7.8E-06  | 1.0E-04 | 0.94     |
| PC9  | 0.28%                    | 3.4E-04   | 2.2E-04 | 0.13    | 2.5E-04  | 1.3E-04 | 0.050    |
| PC10 | 0.22%                    | -1.7E-04  | 2.5E-04 | 0.49    | -8.2E-05 | 1.5E-04 | 0.58     |
| PC11 | 0.14%                    | 4.2E-04   | 3.3E-04 | 0.21    | 2.7E-04  | 1.8E-04 | 0.14     |
| PC12 | 0.11%                    | -5.0E-04  | 3.7E-04 | 0.17    | -2.9E-04 | 2.0E-04 | 0.15     |
| PC13 | 0.09%                    | -8.2E-06  | 3.9E-04 | 0.98    | 1.1E-04  | 2.3E-04 | 0.63     |
| PC14 | 0.07%                    | -4.4E-04  | 4.6E-04 | 0.34    | -5.8E-04 | 2.5E-04 | 0.022    |
| PC15 | 0.05%                    | 4.6E-04   | 5.6E-04 | 0.41    | 2.1E-04  | 2.9E-04 | 0.47     |
| PC16 | 0.03%                    | -3.4E-04  | 6.4E-04 | 0.60    | -2.7E-04 | 3.7E-04 | 0.46     |
| PC17 | 0.03%                    | -1.1E-03  | 7.3E-04 | 0.12    | -5.1E-04 | 3.8E-04 | 0.18     |
| PC18 | 0.01%                    | 1.1E-03   | 1.0E-03 | 0.29    | 3.4E-04  | 5.5E-04 | 0.54     |
| PC19 | 0.01%                    | -7.4E-04  | 1.4E-03 | 0.59    | -1.3E-04 | 8.1E-04 | 0.88     |
| PC20 | 0.01%                    | 1.2E-03   | 1.6E-03 | 0.45    | 1.4E-04  | 8.8E-04 | 0.88     |
| PC21 | 0.00%                    | 2.4E-03   | 1.7E-03 | 0.16    | 9.2E-04  | 9.6E-04 | 0.34     |
| PC22 | 0.00%                    | -1.5E-03  | 1.9E-03 | 0.42    | -1.0E-03 | 1.1E-03 | 0.34     |
| PC23 | 0.00%                    | 2.8E-03   | 2.4E-03 | 0.25    | 9.7E-04  | 1.4E-03 | 0.48     |
| PC24 | 0.00%                    | -2.7E-03  | 2.6E-03 | 0.30    | -2.5E-03 | 1.5E-03 | 0.10     |
| PC25 | 0.00%                    | 3.2E-03   | 2.8E-03 | 0.25    | 6.4E-04  | 1.6E-03 | 0.70     |
| PC26 | 0.00%                    | -1.4E-03  | 3.3E-03 | 0.67    | -8.3E-04 | 2.0E-03 | 0.67     |
| PC27 | 0.00%                    | -3.2E-04  | 3.6E-03 | 0.93    | -1.8E-04 | 2.2E-03 | 0.93     |
| PC28 | 0.00%                    | -2.0E-02  | 8.0E-03 | 0.01    | -5.4E-03 | 2.3E-03 | 0.021    |
| PC29 | 0.00%                    | -1.2E-03  | 4.4E-03 | 0.79    | -1.0E-03 | 2.6E-03 | 0.70     |
| PC30 | 0.00%                    | -2.9E-03  | 4.8E-03 | 0.55    | 6.6E-04  | 2.9E-03 | 0.82     |
| PC31 | 0.00%                    | 1.7E-04   | 5.3E-03 | 0.97    | 1.1E-04  | 3.2E-03 | 0.97     |
| PC32 | 0.00%                    | -5.8E-03  | 6.5E-03 | 0.37    | -2.6E-03 | 3.8E-03 | 0.49     |
| PC33 | 0.00%                    | 4.1E-03   | 6.6E-03 | 0.53    | 3.8E-03  | 3.9E-03 | 0.33     |
| PC34 | 0.00%                    | -2.8E-03  | 7.0E-03 | 0.68    | -1.2E-03 | 4.1E-03 | 0.76     |
| PC35 | 0.00%                    | -4.2E-03  | 7.5E-03 | 0.58    | -2.7E-03 | 4.5E-03 | 0.55     |
| PC36 | 0.00%                    | -6.3E-03  | 7.9E-03 | 0.43    | -2.5E-03 | 4.6E-03 | 0.59     |
| PC37 | 0.00%                    | 1.4E-02   | 9.5E-03 | 0.13    | 7.4E-03  | 5.3E-03 | 0.17     |
| PC38 | 0.00%                    | -8.6E-03  | 1.0E-02 | 0.39    | -1.9E-03 | 5.9E-03 | 0.74     |
| PC39 | 0.00%                    | 1.0E-03   | 1.1E-02 | 0.93    | 1.6E-04  | 6.5E-03 | 0.98     |
| PC40 | 0.00%                    | -5.4E-03  | 1.3E-02 | 0.68    | -2.3E-03 | 7.7E-03 | 0.76     |
| PC41 | 0.00%                    | 9.4E-04   | 1.4E-02 | 0.95    | -3.1E-03 | 8.4E-03 | 0.71     |
| PC42 | 0.00%                    | -2.1E-02  | 1.6E-02 | 0.19    | -1.6E-02 | 9.3E-03 | 0.09     |
| PC43 | 0.00%                    | -5.4E-03  | 1.8E-02 | 0.76    | -2.5E-03 | 1.1E-02 | 0.81     |
| PC44 | 0.00%                    | 1.1E-02   | 1.9E-02 | 0.55    | 1.1E-02  | 1.1E-02 | 0.31     |
| PC45 | 0.00%                    | 4.2E-02   | 2.2E-02 | 0.058   | 1.9E-02  | 1.2E-02 | 0.12     |
| PC46 | 0.00%                    | 2.4E-02   | 2.2E-02 | 0.28    | 9.6E-03  | 1.3E-02 | 0.46     |
| PC47 | 0.00%                    | 3.3E-02   | 2.4E-02 | 0.17    | 1.5E-02  | 1.4E-02 | 0.26     |
| PC48 | 0.00%                    | 2.7E-03   | 2.6E-02 | 0.92    | 1.2E-04  | 1.5E-02 | 0.99     |
| PC49 | 0.00%                    | 4.5E-02   | 2.9E-02 | 0.12    | 1.5E-02  | 1.7E-02 | 0.36     |
| PC50 | 0.00%                    | 2.6E-02   | 3.0E-02 | 0.39    | 3.0E-02  | 1.7E-02 | 0.08     |
| PC51 | 0.00%                    | -2.5E-02  | 3.4E-02 | 0.45    | -4.5E-03 | 2.0E-02 | 0.82     |
| PC52 | 0.00%                    | -3.3E-02  | 3.7E-02 | 0.38    | -1.6E-02 | 2.2E-02 | 0.46     |
| PC53 | 0.00%                    | 4.5E-02   | 4.0E-02 | 0.26    | 2.8E-02  | 2.3E-02 | 0.22     |
| PC54 | 0.00%                    | 1.3E-02   | 4.3E-02 | 0.77    | 1.4E-02  | 2.6E-02 | 0.59     |
| PC55 | 0.00%                    | -6.1E-02  | 4.7E-02 | 0.19    | -2.2E-02 | 2.6E-02 | 0.41     |

|      |       |          |         |       |          |         |      |
|------|-------|----------|---------|-------|----------|---------|------|
| PC56 | 0.00% | -3.2E-02 | 5.0E-02 | 0.52  | -1.6E-02 | 2.9E-02 | 0.59 |
| PC57 | 0.00% | 6.4E-02  | 6.0E-02 | 0.29  | -6.6E-03 | 3.5E-02 | 0.85 |
| PC58 | 0.00% | 1.1E-01  | 6.7E-02 | 0.08  | 3.8E-02  | 3.7E-02 | 0.31 |
| PC59 | 0.00% | -6.9E-02 | 6.8E-02 | 0.31  | -1.4E-02 | 4.0E-02 | 0.73 |
| PC60 | 0.00% | -5.0E-03 | 7.4E-02 | 0.95  | 2.0E-02  | 4.4E-02 | 0.65 |
| PC61 | 0.00% | -1.2E-02 | 8.0E-02 | 0.88  | 2.0E-02  | 4.8E-02 | 0.67 |
| PC62 | 0.00% | -1.5E-01 | 8.8E-02 | 0.08  | -6.3E-02 | 5.0E-02 | 0.21 |
| PC63 | 0.00% | 3.5E-02  | 9.7E-02 | 0.71  | 2.0E-02  | 5.7E-02 | 0.73 |
| PC64 | 0.00% | 2.2E-01  | 1.2E-01 | 0.059 | 7.3E-02  | 6.6E-02 | 0.27 |
| PC65 | 0.00% | 5.2E-02  | 1.4E-01 | 0.70  | 4.1E-02  | 8.0E-02 | 0.61 |
| PC66 | 0.00% | 7.8E-02  | 1.5E-01 | 0.59  | -1.4E-05 | 8.7E-02 | 1.00 |
| PC67 | 0.00% | 9.1E-02  | 1.8E-01 | 0.61  | -1.9E-02 | 1.1E-01 | 0.86 |
| PC68 | 0.00% | 1.9E-02  | 2.0E-01 | 0.93  | 2.3E-02  | 1.2E-01 | 0.85 |
| PC69 | 0.00% | -4.0E-03 | 2.3E-01 | 0.99  | -2.4E-02 | 1.3E-01 | 0.86 |
| PC70 | 0.00% | -1.9E-01 | 2.6E-01 | 0.46  | -9.5E-02 | 1.5E-01 | 0.53 |
| PC71 | 0.00% | -6.1E-02 | 2.8E-01 | 0.83  | -3.0E-02 | 1.7E-01 | 0.86 |
| PC72 | 0.00% | 3.2E-02  | 3.1E-01 | 0.92  | -1.9E-02 | 1.9E-01 | 0.92 |
| PC73 | 0.00% | -2.5E-03 | 3.5E-01 | 0.99  | 6.4E-02  | 2.1E-01 | 0.76 |
| PC74 | 0.00% | 4.5E-01  | 4.1E-01 | 0.27  | 2.7E-01  | 2.4E-01 | 0.27 |
| PC75 | 0.00% | 1.8E-01  | 4.8E-01 | 0.71  | 1.0E-01  | 2.9E-01 | 0.73 |
| PC76 | 0.00% | -1.6E-01 | 5.4E-01 | 0.76  | -9.8E-02 | 3.2E-01 | 0.76 |
| PC77 | 0.00% | 6.5E-01  | 6.4E-01 | 0.31  | 3.3E-01  | 3.7E-01 | 0.37 |
| PC78 | 0.00% | 9.9E-01  | 7.4E-01 | 0.19  | 4.5E-01  | 4.3E-01 | 0.30 |
| PC79 | 0.00% | 6.4E-01  | 7.8E-01 | 0.41  | 2.2E-01  | 4.6E-01 | 0.64 |
| PC80 | 0.00% | 3.6E-01  | 9.2E-01 | 0.70  | 3.5E-01  | 5.4E-01 | 0.52 |
| PC81 | 0.00% | 5.2E-01  | 1.1E+00 | 0.63  | -5.1E-01 | 6.4E-01 | 0.43 |
| PC82 | 0.00% | -2.0E+00 | 1.7E+00 | 0.24  | -1.2E+00 | 9.8E-01 | 0.21 |
| PC83 | 0.00% | -5.1E-01 | 1.7E+00 | 0.77  | -6.8E-02 | 1.0E+00 | 0.95 |

**Figure S1.** Pre-processing. (A) Distributions of all proteins (variance). (B) Proportion of non-zero values.

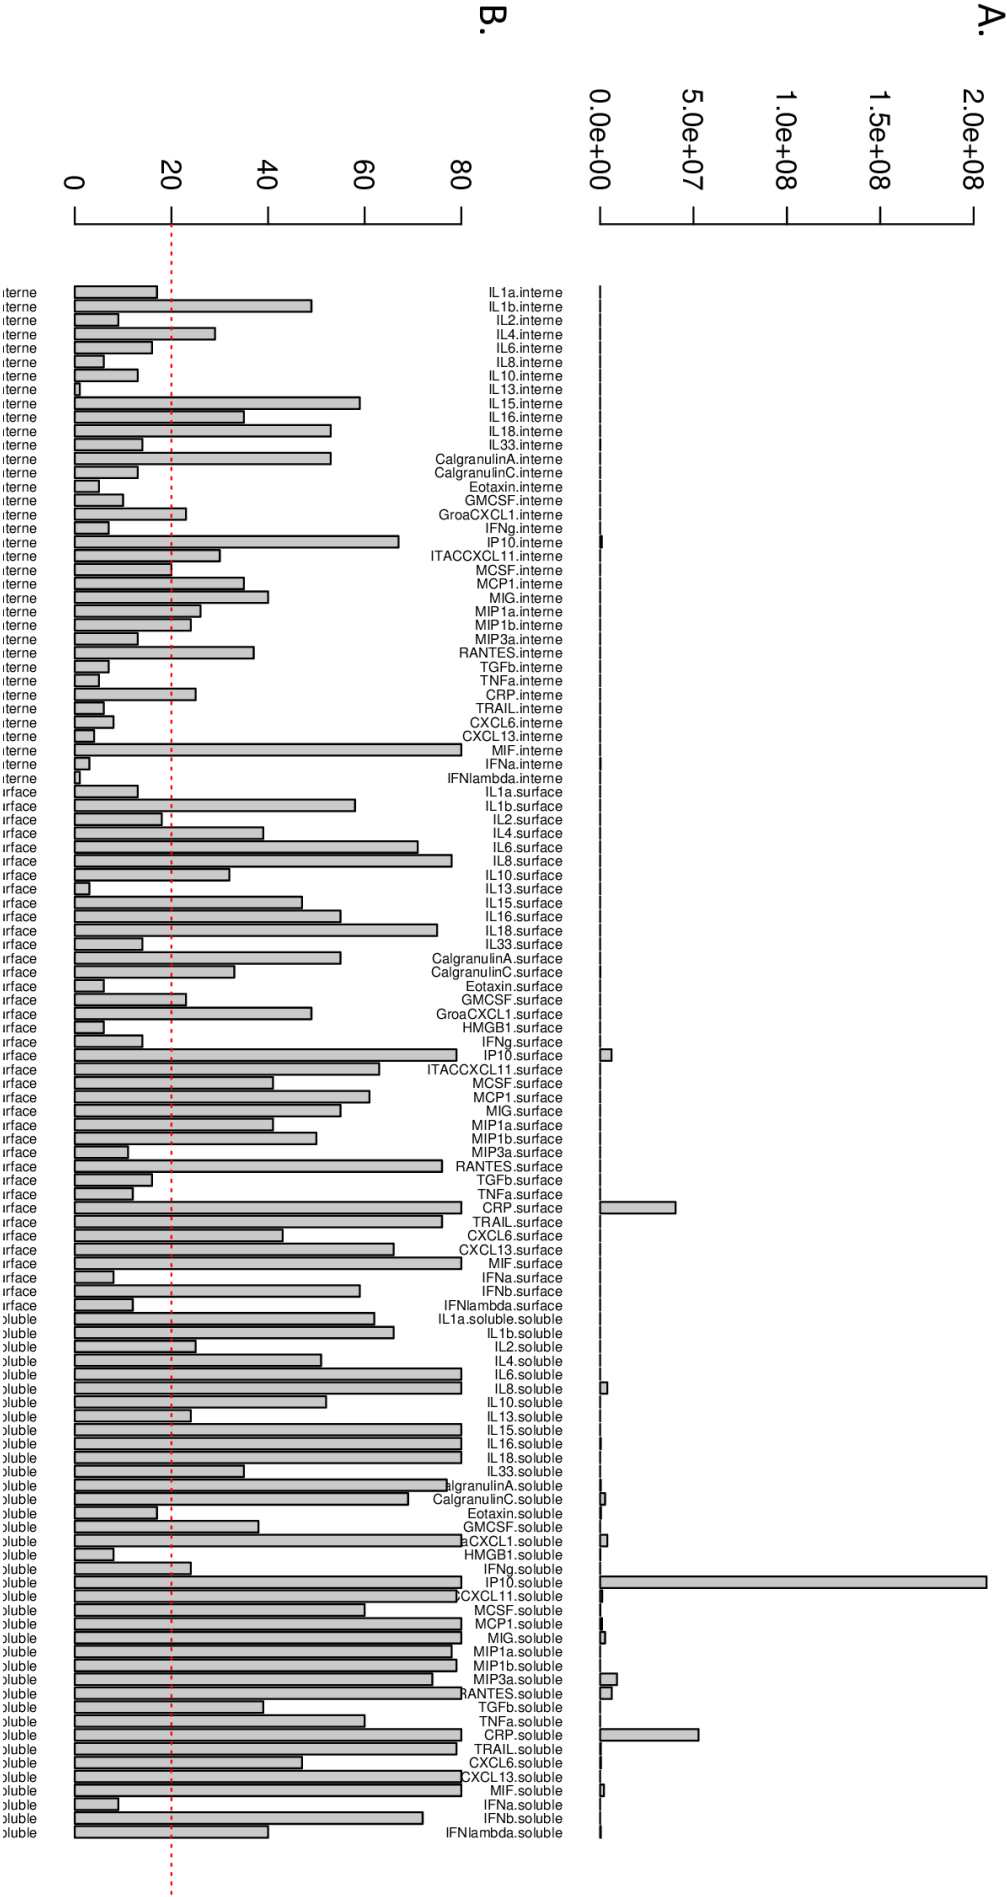

**Figure S2.** Data dimension reduction based on principal component analysis (PCA): cu-mulative variance explained by cellular classes are provided. (A) Internal cytokines. (B) Sur-face-linked cytokines. (C) Soluble cytokines. (D) Overall cytokines.

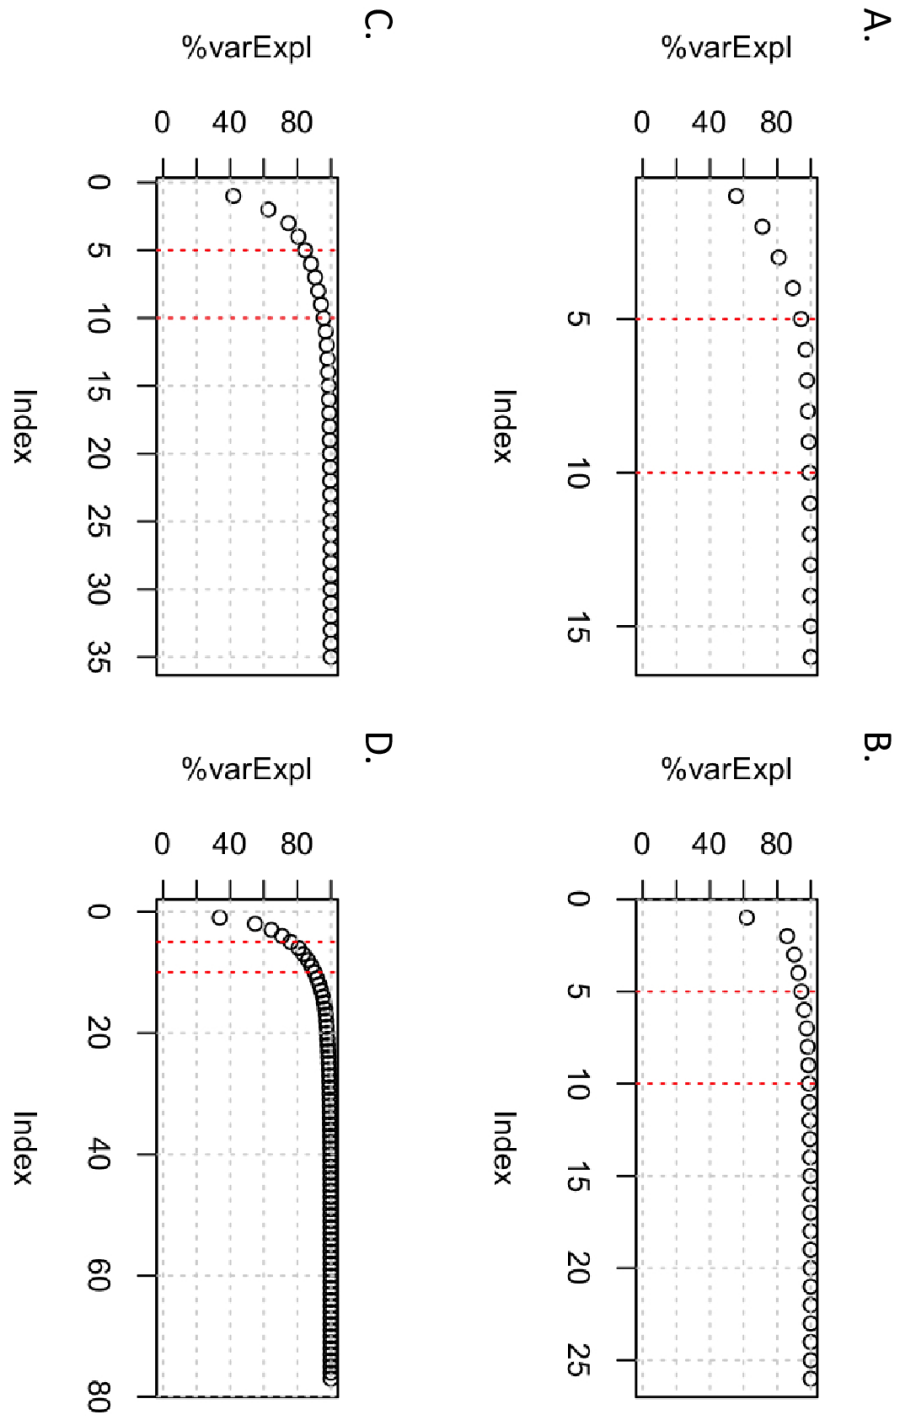

Supplement: s1 [file s1]
